# Supplementary material for: Improved efficiency and air stability of two-dimensional p-i-n inverted perovskite solar cells by Cs doping
Source: Royal Society of Chemistry journal article supplement (doi:10.1039/d1ra02574k), 2021-01-01
Supplement: d1ra02574k1.pdf [file d1ra02574k1.pdf]

**(Supplementary Information)**

**Improved efficiency and air stability of two-dimensional p-i-n inverted  
perovskite solar cells by Cs doping**

Tzu-Chien Hsieh<sup>1,5</sup>, Chung-Yueh Shih<sup>1,5</sup>, Yu-Chiang Chao<sup>2,\*</sup>, I-Chun Cheng<sup>3,4,6,\*</sup>, Jian-Zhang  
Chen<sup>1,5,6,\*</sup>

<sup>1</sup>Graduate Institute of Applied Mechanics, National Taiwan University, Taipei City 10617,  
Taiwan

<sup>2</sup>Department of Physics, National Taiwan Normal University, Taipei City 11677, Taiwan

<sup>3</sup>Graduate Institute of Photonics and Optoelectronics, National Taiwan University, Taipei City  
10617, Taiwan

<sup>4</sup>Department of Electrical Engineering, National Taiwan University, Taipei City 10617, Taiwan

<sup>5</sup>Advanced Research Center for Green Materials Science and Technology, National Taiwan  
University, Taipei City 10617, Taiwan

<sup>6</sup>Innovative Photonics Advanced Research Center (i-PARC), National Taiwan University,  
Taipei City 10617, Taiwan

**Corresponding Authors**

\*Jian-Zhang Chen      Email: [jchen@ntu.edu.tw](mailto:jchen@ntu.edu.tw)

I-Chun Cheng      Email: [iccheng@ntu.edu.tw](mailto:iccheng@ntu.edu.tw)

Yu-Chiang Chao      Email: [ycchao@ntnu.edu.tw](mailto:ycchao@ntnu.edu.tw)

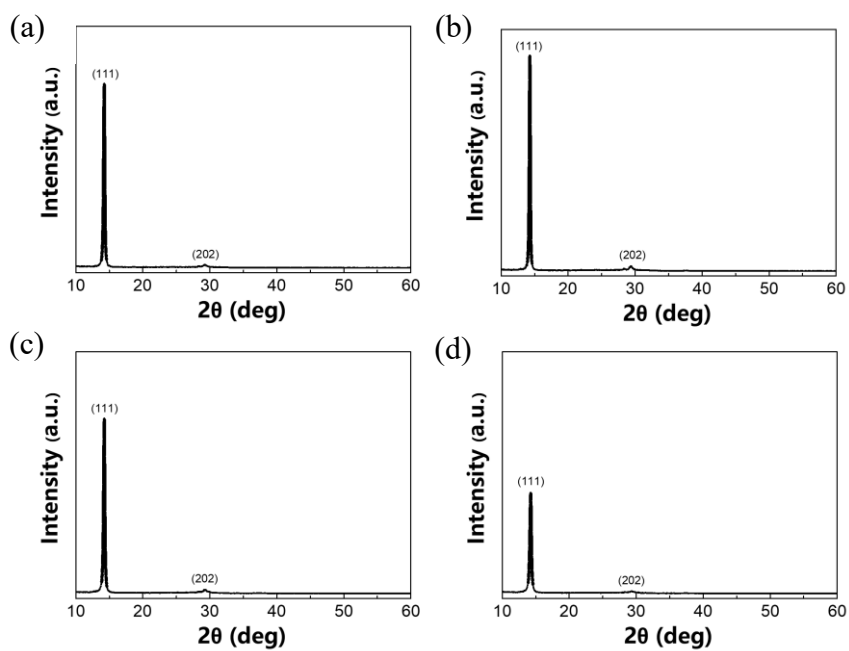

Figure S1. GIXRD diffraction patterns of 2D perovskite films doped with (a) 5%, (b) 10%, (c) 15%, and (d) 20% Cs.

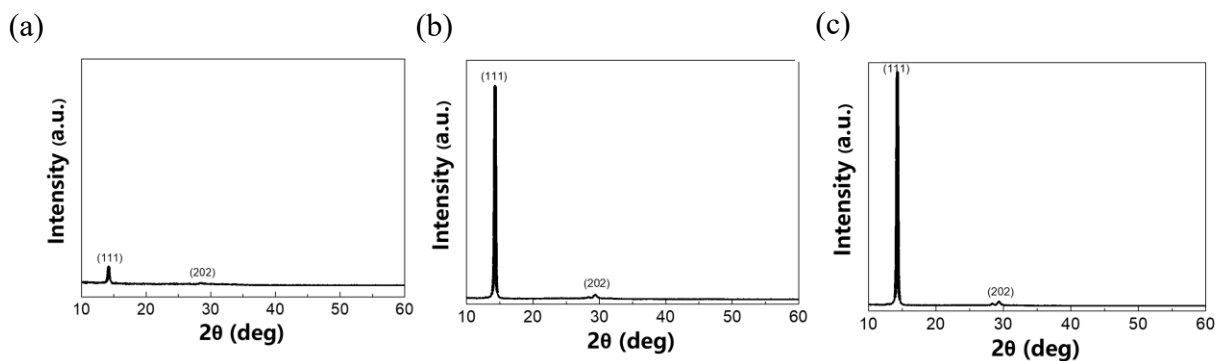

Figure S2. GIXRD diffraction patterns of 2D perovskite film with 10% Cs doping. The films were prepared with various constituent chemical molar concentrations: (a) 1.0 M , (b) 1.2 M , and (c) 1.4 M.

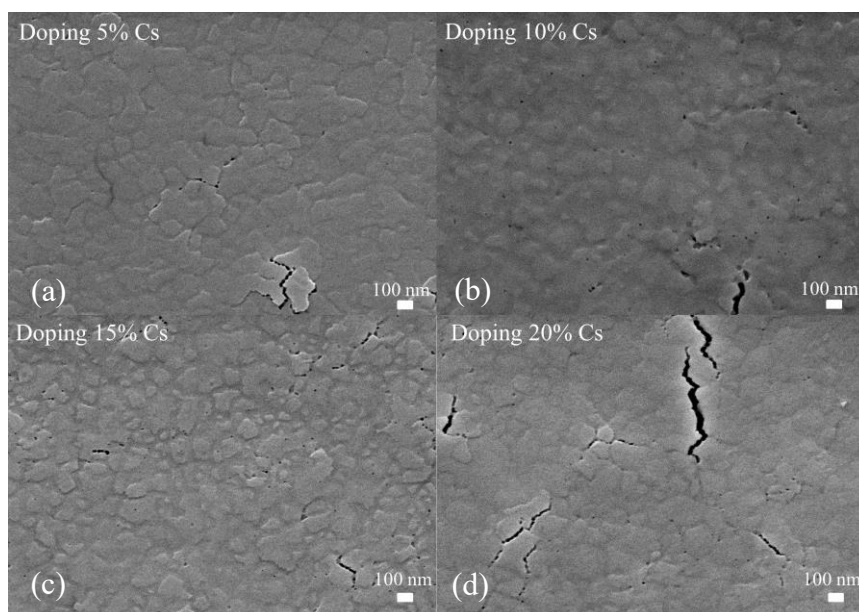

Figure S3. Topview SEM images of 2D perovskite films doped with (a) 5% , (b) 10% , (c) 15% , and (d) 20% Cs.

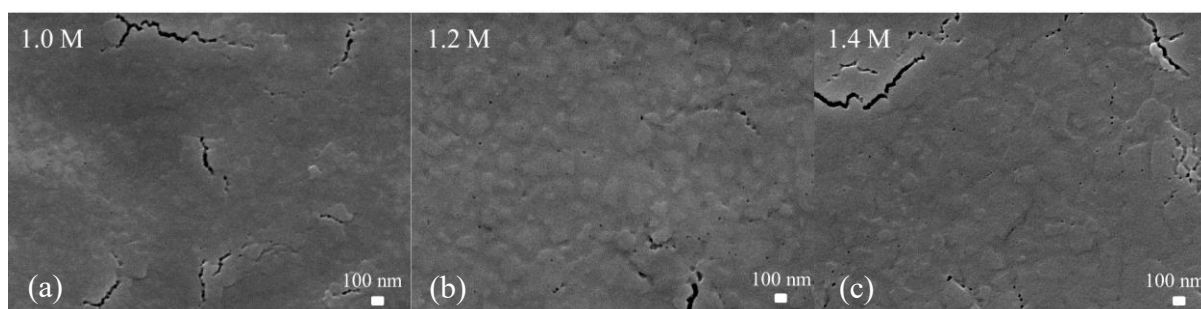

Figure S4. Top-view SEM images of 2D perovskite films with 10% Cs doping. The films were prepared with various constituent chemical molar concentrations: (a) 1.0 M , (b) 1.2 M , and (c) 1.4 M.

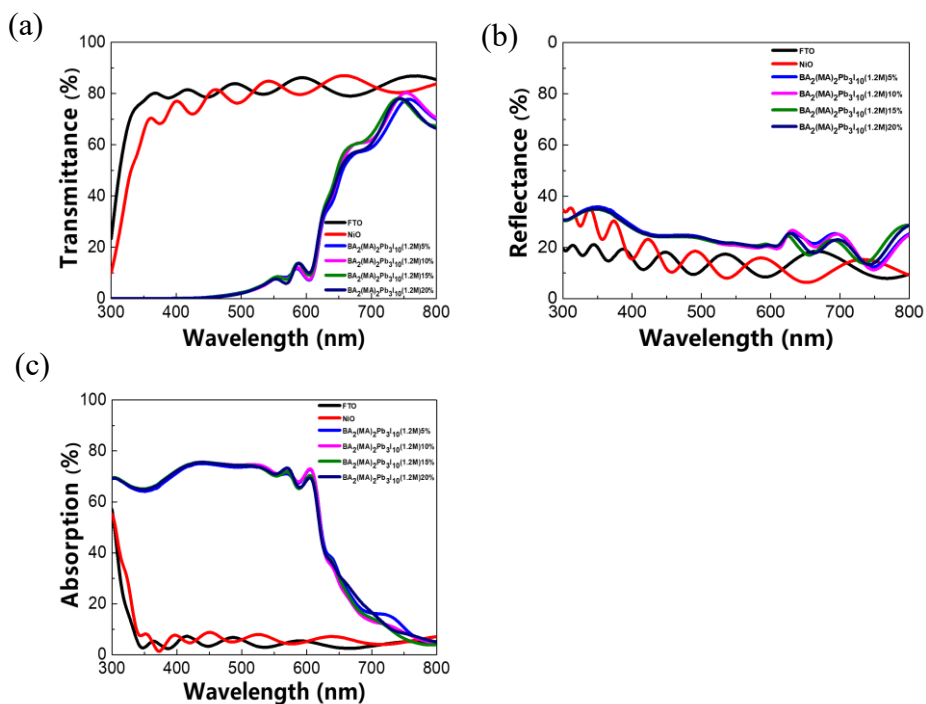

Figure S5. UV–Vis spectra of 2D perovskite films: (a) transmittance, (b) reflectance, and (c) absorption spectra.

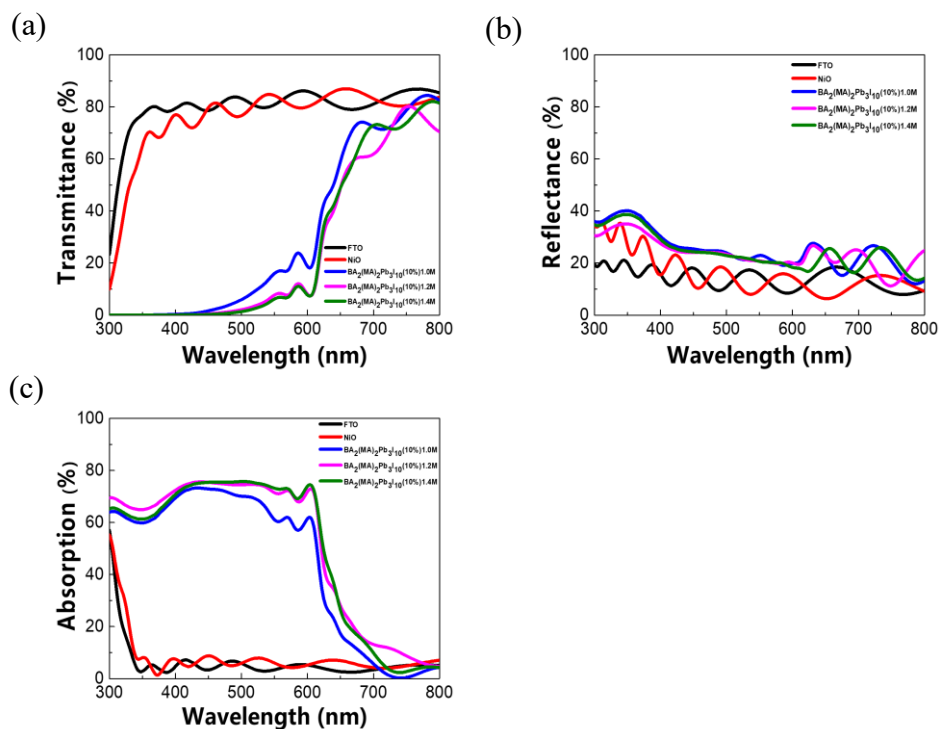

Figure S6. UV–Vis spectra of 2D perovskite films doped with 10% Cs doping but prepared with different constituent chemical molar concentrations: (a) transmittance, (b) reflectance, and (c) absorption spectra.

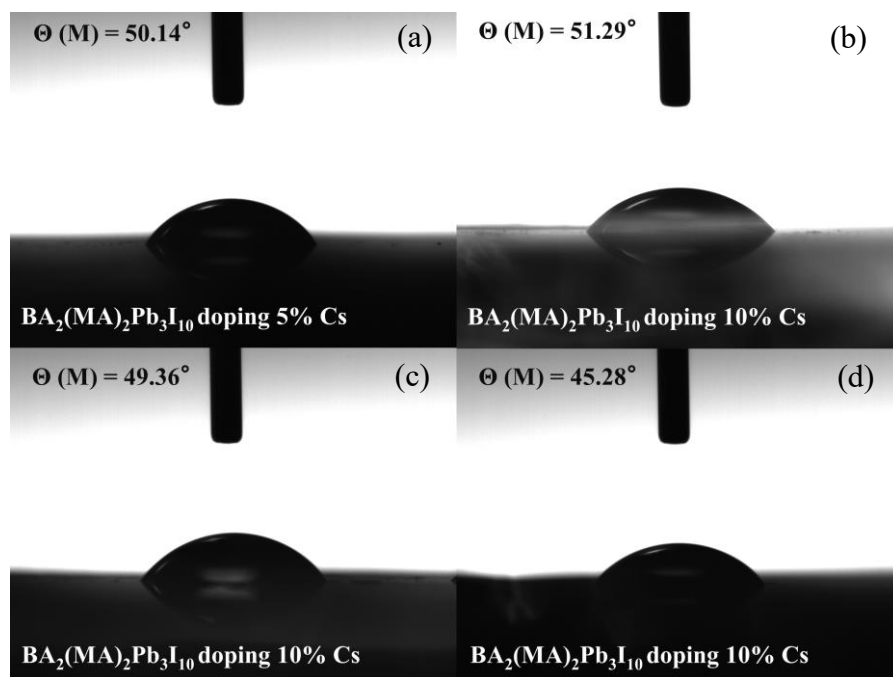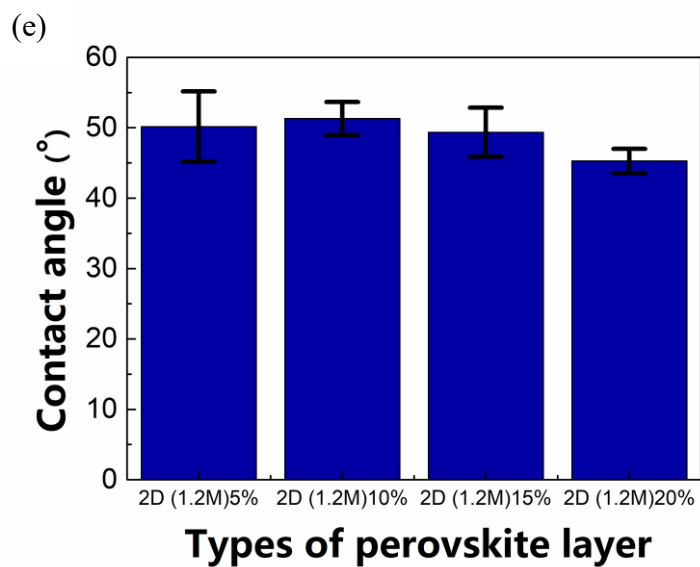

Figure S7. Water contact angle images of 2D perovskite films doped with (a) 5% , (b) 10% , (c) 15% , and (d) 20% Cs. (e) Comparison of water contact angles of perovskite films prepared with various Cs doping concentrations.

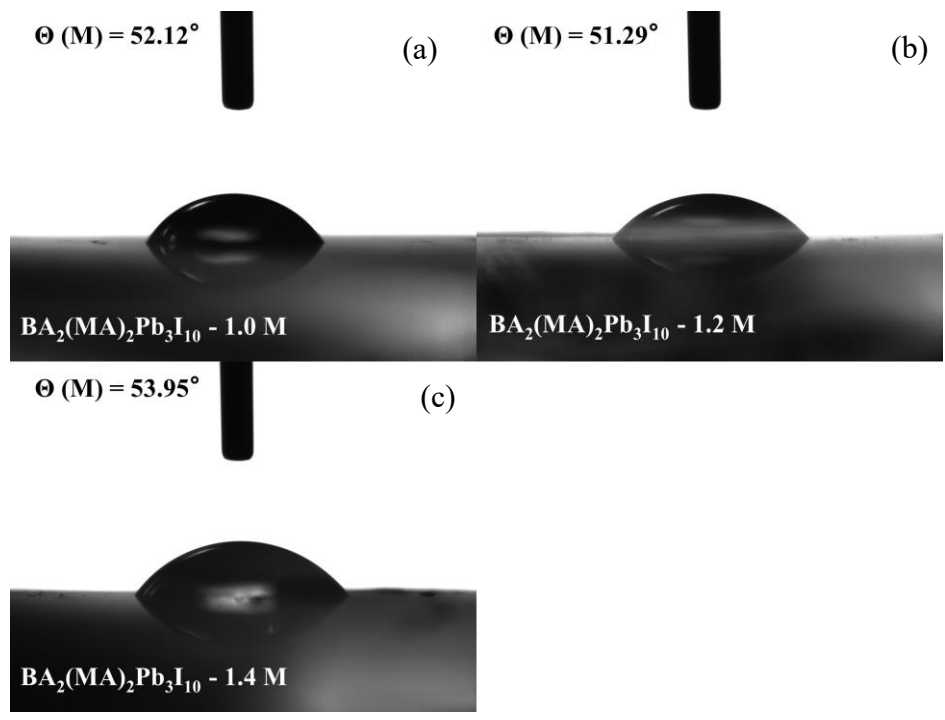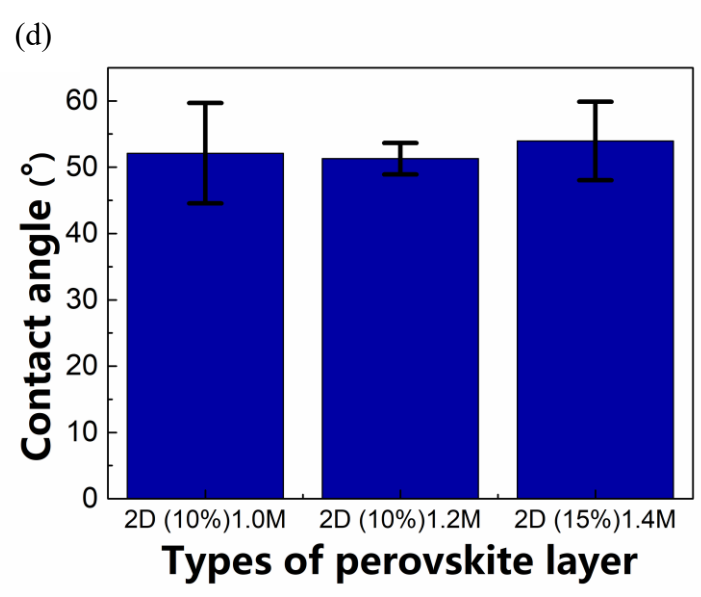

Figure S8. Water contact angle images of 2D perovskite films doped with 10% Cs but prepared with different constituent chemical molar concentrations: (a) 1.0 M , (b) 1.2 M , and (c) 1.4 M. (d) Comparison of water contact angles.

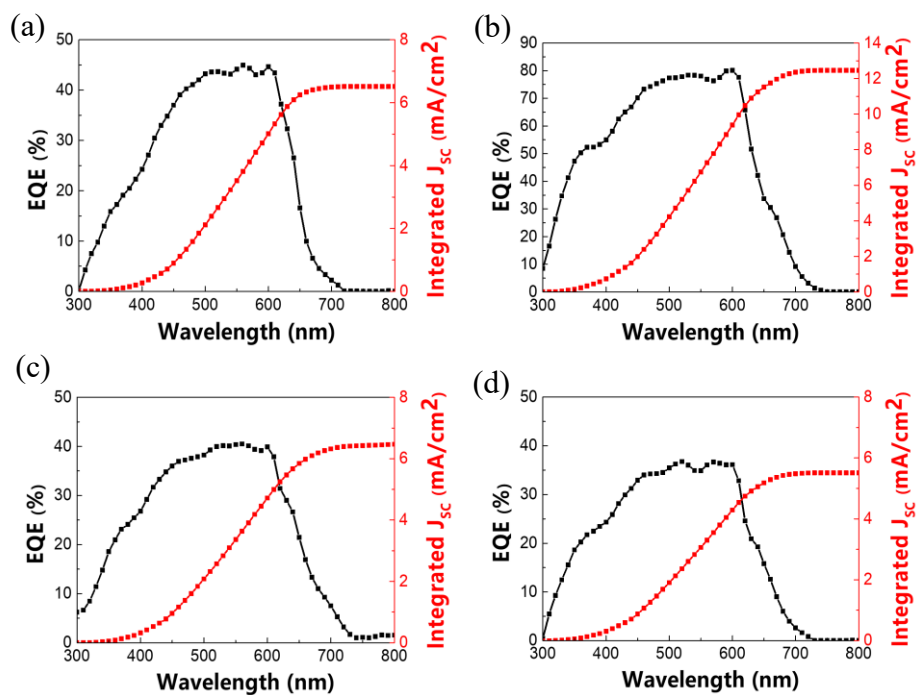

Figure S9. EQE and corresponding integrated photocurrent curve of PSCs doped with (a) 5%, (b) 10%, (c) 15%, and (d) 20% Cs.

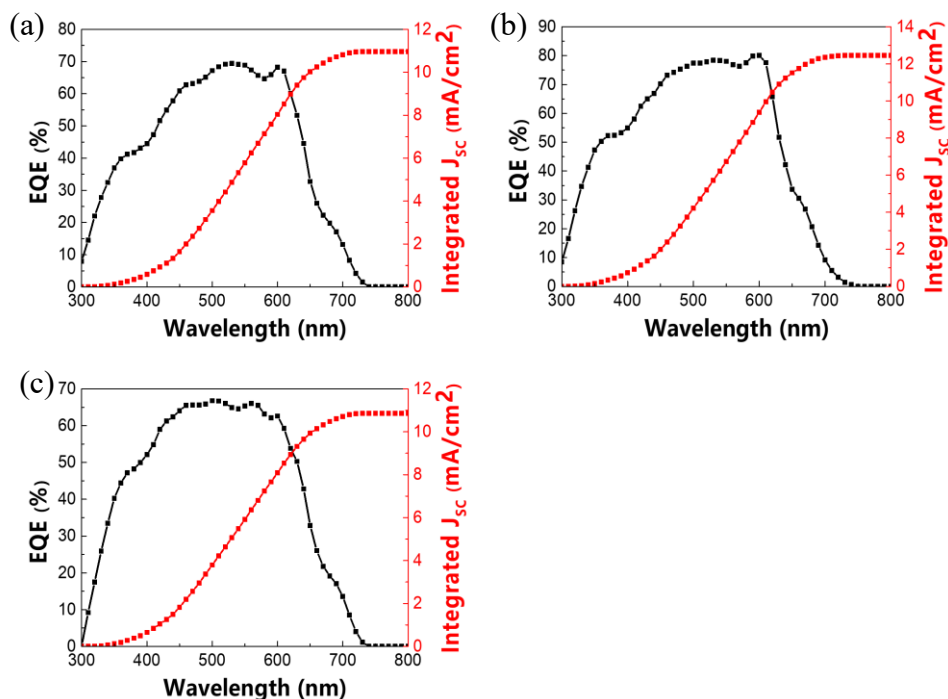

Figure S10. EQE and corresponding integrated photocurrent curves of PSCs doped with 10% Cs but prepared with different constituent chemical molar concentrations: (a) 1.0 M, (b) 1.2 M, and (c) 1.4 M.

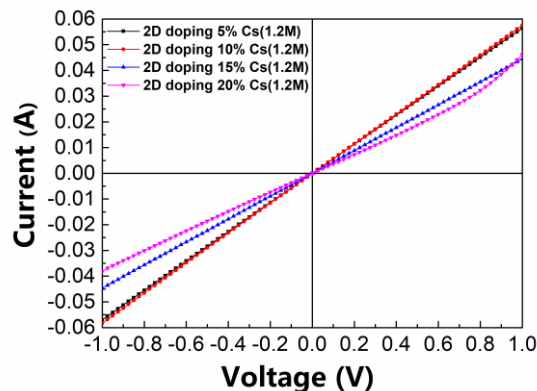

Figure S11. Through-plane conductivity measurement of perovskite films with various Cs doping concentrations.

Table S1. Through-plane conductivity of perovskite films with various Cs doping concentrations.

| Perovskite film                                                            | Conductivity ( $\text{mS}\cdot\text{m}^{-1}$ ) |
|----------------------------------------------------------------------------|------------------------------------------------|
| 1.2M $\text{BA}_2(\text{MA})_2\text{Pb}_3\text{I}_{10}$ with 5% Cs doping  | $2.52 \pm 1.51698 \text{ E-}02$                |
| 1.2M $\text{BA}_2(\text{MA})_2\text{Pb}_3\text{I}_{10}$ with 10% Cs doping | $2.56 \pm 1.64175 \text{ E-}02$                |
| 1.2M $\text{BA}_2(\text{MA})_2\text{Pb}_3\text{I}_{10}$ with 15% Cs doping | $1.98 \pm 6.89928 \text{ E-}03$                |
| 1.2M $\text{BA}_2(\text{MA})_2\text{Pb}_3\text{I}_{10}$ with 20% Cs doping | $1.68 \pm 9.20934 \text{ E-}02$                |

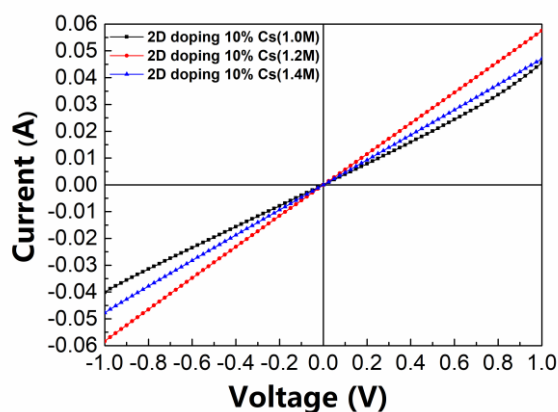

Figure S12. Through-plane conductivity measurement of perovskite films with 10% Cs doping but prepared with various constituent chemical molar concentrations.

Table S2. Through-plane conductivity of perovskite films with 10% Cs doping but prepared



with various constituent chemical molar concentrations.

| Perovskite film                                                            | Conductivity ( $\text{mS}\cdot\text{m}^{-1}$ ) |
|----------------------------------------------------------------------------|------------------------------------------------|
| 1.0M $\text{BA}_2(\text{MA})_2\text{Pb}_3\text{I}_{10}$ with 10% Cs doping | $1.78 \pm 6.51451 \text{ E-}02$                |
| 1.2M $\text{BA}_2(\text{MA})_2\text{Pb}_3\text{I}_{10}$ with 10% Cs doping | $2.56 \pm 1.64175 \text{ E-}02$                |
| 1.4M $\text{BA}_2(\text{MA})_2\text{Pb}_3\text{I}_{10}$ with 10% Cs doping | $2.08 \pm 1.71285 \text{ E-}02$                |

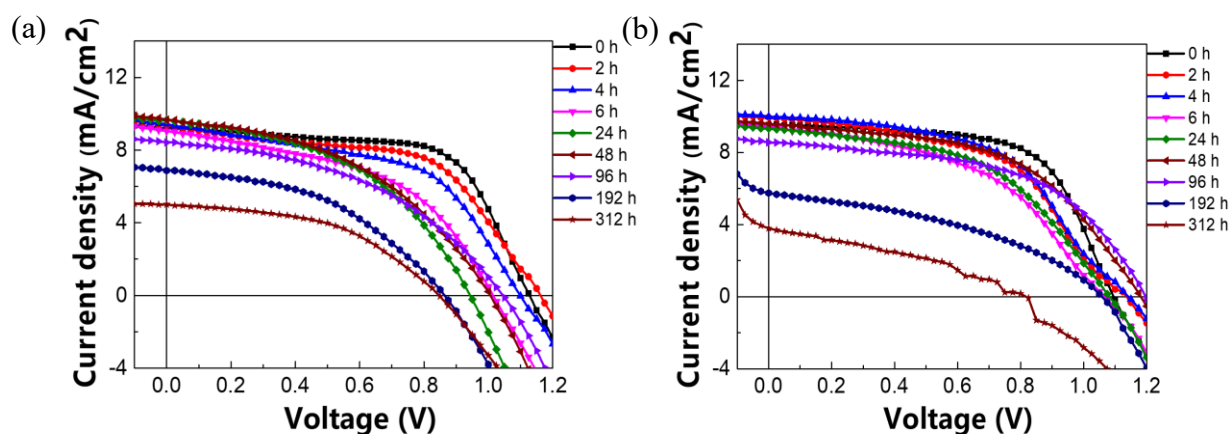

Figure S13. Evolutions of JV curves of PSCs without Cs doping when exposed to air:

(a) reverse and (b) forward scans.

Table S3. Evolutions of PV parameters of PSCs without Cs doping when exposed to air.

| Time |         | $V_{oc}$ (V) | $J_{sc}$ ( $\text{mA}/\text{cm}^2$ ) | F.F. (%) | PCE (%) |
|------|---------|--------------|--------------------------------------|----------|---------|
| 0 h  | Forward | 1.096        | 9.528                                | 63.087   | 6.588   |
|      | Reverse | 1.121        | 9.192                                | 65.058   | 6.702   |
| 2 h  | Forward | 1.171        | 9.949                                | 48.738   | 5.676   |
|      | Reverse | 1.160        | 9.373                                | 55.953   | 6.084   |
| 4 h  | Forward | 1.139        | 9.986                                | 51.466   | 5.853   |
|      | Reverse | 1.099        | 9.431                                | 52.770   | 5.469   |
| 6 h  | Forward | 1.064        | 9.440                                | 46.943   | 4.716   |
|      | Reverse | 1.014        | 9.044                                | 47.887   | 4.393   |
| 24 h | Forward | 1.081        | 9.323                                | 49.603   | 4.997   |
|      | Reverse | 0.944        | 9.655                                | 45.804   | 4.174   |
| 48h  | Forward | 1.182        | 9.590                                | 51.952   | 5.890   |

|       |         |       |       |        |       |
|-------|---------|-------|-------|--------|-------|
|       | Reverse | 1.005 | 9.668 | 44.013 | 4.275 |
| 96 h  | Forward | 1.201 | 8.557 | 52.922 | 5.440 |
|       | Reverse | 1.045 | 8.418 | 43.974 | 3.869 |
| 192 h | Forward | 1.059 | 5.748 | 39.777 | 2.421 |
|       | Reverse | 0.864 | 6.874 | 44.45  | 2.640 |
| 312 h | Forward | 0.864 | 3.793 | 32.621 | 1.069 |
|       | Reverse | 0.847 | 5.007 | 47.725 | 2.025 |

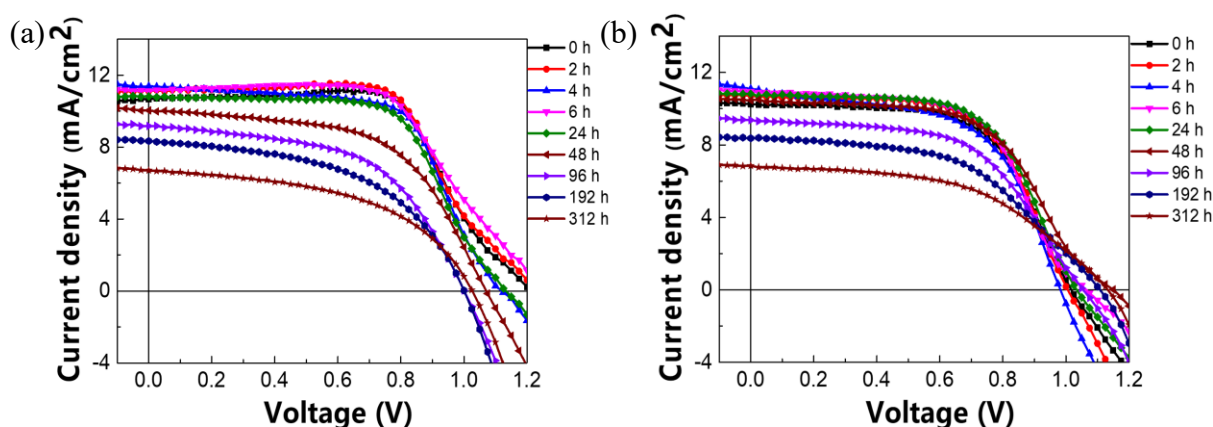

Figure S14. Evolutions of JV curves of PSCs with 10% Cs doping when exposed to air:

(a) reverse and (b) forward scans.

Table S4. Evolutions of PV parameters of PSCs with 10% Cs doping when exposed to air.

| Time |         | $V_{oc}$ (V) | $J_{sc}$ (mA/cm <sup>2</sup> ) | F.F. (%) | PCE (%) |
|------|---------|--------------|--------------------------------|----------|---------|
| 0 h  | Forward | 1.019        | 10.249                         | 61.072   | 6.376   |
|      | Reverse | 1.211        | 10.652                         | 64.310   | 8.297   |
| 2 h  | Forward | 1.005        | 10.719                         | 61.548   | 6.630   |
|      | Reverse | 1.231        | 11.103                         | 62.159   | 8.495   |
| 4 h  | Forward | 0.983        | 11.101                         | 57.158   | 6.235   |
|      | Reverse | 1.120        | 11.382                         | 62.690   | 7.990   |
| 6 h  | Forward | 1.077        | 10.952                         | 57.070   | 6.735   |
|      | Reverse | 1.248        | 11.114                         | 59.555   | 8.262   |
| 24 h | Forward | 1.033        | 10.813                         | 60.822   | 6.793   |
|      | Reverse | 1.130        | 10.817                         | 62.778   | 7.672   |
| 48 h | Forward | 1.151        | 10.462                         | 54.684   | 6.586   |
|      | Reverse | 1.071        | 10.039                         | 56.953   | 6.122   |

|       |         |       |       |        |       |
|-------|---------|-------|-------|--------|-------|
| 96 h  | Forward | 1.054 | 9.366 | 55.370 | 5.466 |
|       | Reverse | 1.002 | 9.173 | 54.154 | 4.975 |
| 192 h | Forward | 1.109 | 8.368 | 50.722 | 4.705 |
|       | Reverse | 1.003 | 8.336 | 50.606 | 4.230 |
| 312 h | Forward | 1.134 | 6.850 | 50.331 | 3.910 |
|       | Reverse | 1.029 | 6.708 | 49.952 | 3.447 |

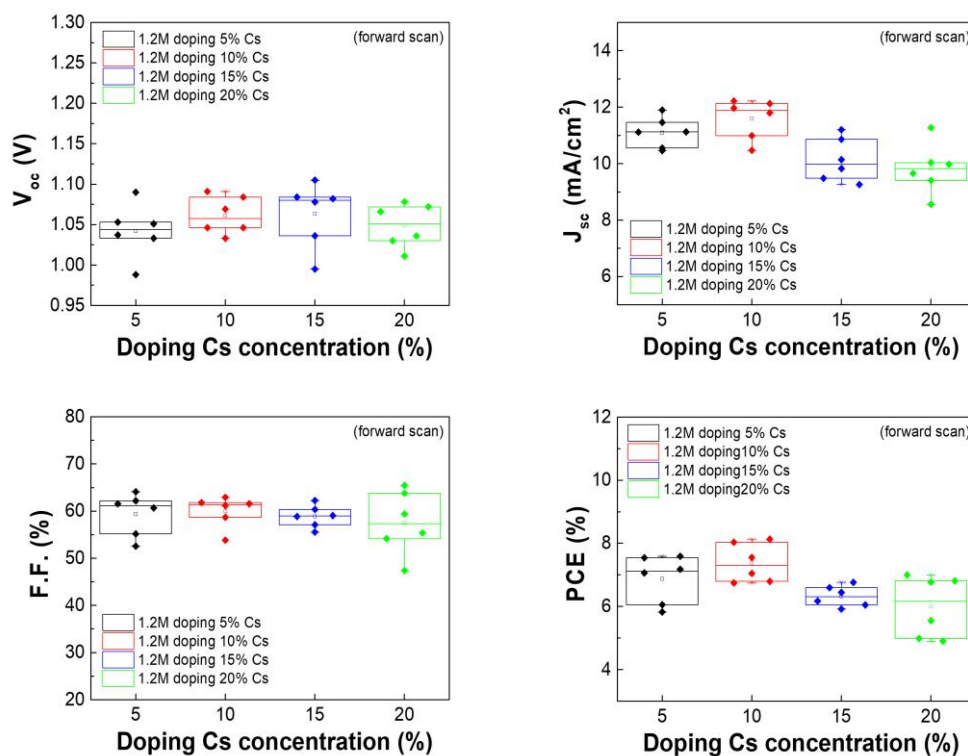

Figure S15. PV parameters of PSCs with different Cs doping concentrations (forward scan).

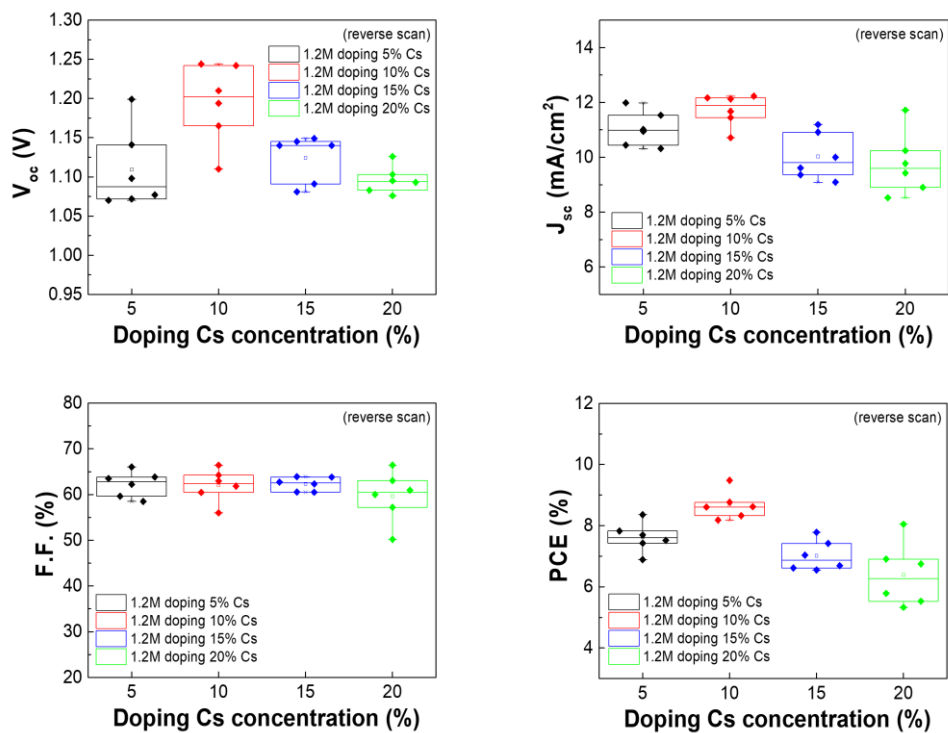

Figure S16. PV parameters of PSCs with different Cs doping concentrations (reverse scan).

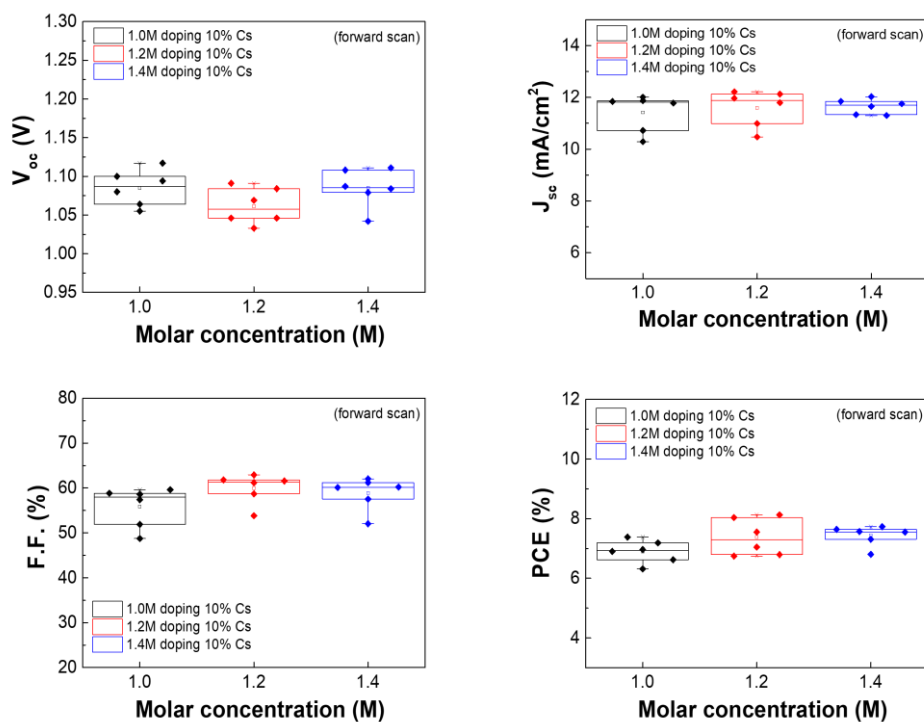

Figure S17. PV parameters of PSCs with 10% Cs doping but prepared with different constituent chemical molar concentrations (forward scan).

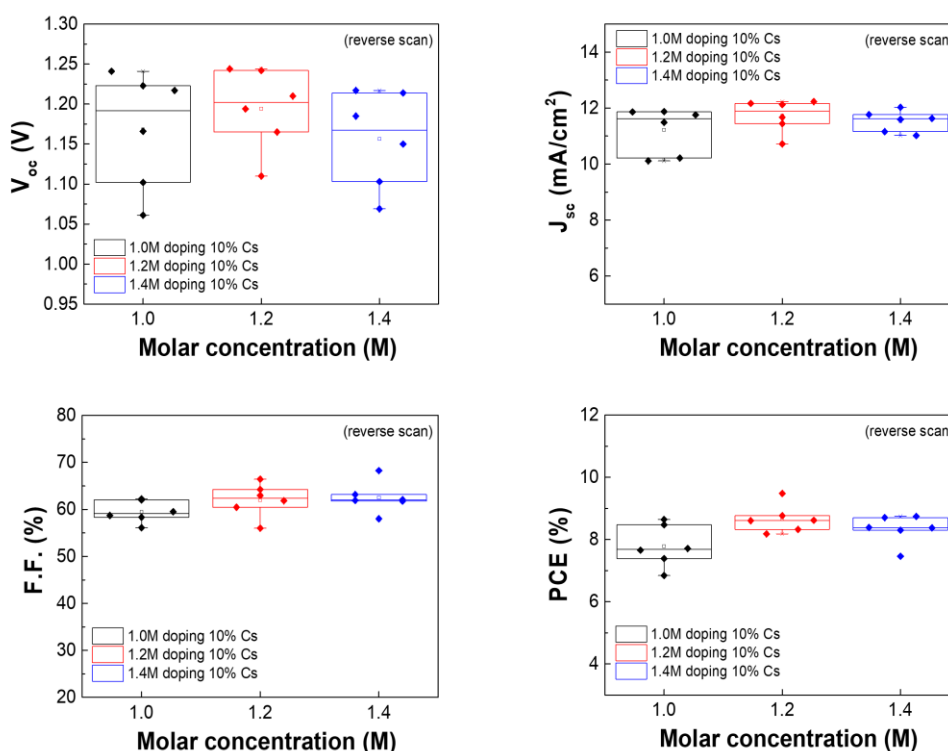

Figure S18. PV parameters of PSCs with 10% Cs doping but prepared with different constituent chemical molar concentrations (reverse scan).

Table S5. PV parameters of PSCs with various Cs doping concentrations.

| Different Cs concentrations |         | $V_{oc}$ (V) | $J_{sc}$ (mA/cm <sup>2</sup> ) | F.F. (%)     | PCE (%)     |
|-----------------------------|---------|--------------|--------------------------------|--------------|-------------|
| 5 %                         | forward | 1.042±0.033  | 11.101±0.543                   | 59.369±4.493 | 6.875±0.756 |
|                             | reverse | 1.110±0.051  | 11.040±0.635                   | 62.290±2.802 | 7.618±0.485 |
| 10 %                        | forward | 1.062±0.023  | 11.595±0.703                   | 59.994±3.328 | 7.383±0.612 |
|                             | reverse | 1.194±0.051  | 11.726±0.584                   | 61.990±3.573 | 8.662±0.454 |
| 15 %                        | forward | 1.089±0.037  | 10.183±0.840                   | 59.429±2.256 | 6.591±0.665 |
|                             | reverse | 1.124±0.030  | 10.028±0.854                   | 62.315±1.505 | 7.015±0.497 |
| 20 %                        | forward | 1.049±0.027  | 9.816±0.893                    | 57.588±6.699 | 6.002±0.968 |
|                             | reverse | 1.096±0.017  | 9.765±1.137                    | 59.645±5.567 | 6.390±1.037 |

Table S6. PV parameters of PSCs with 10% Cs doping but prepared with different constituent chemical molar concentrations.

| Different Cs concentrations | $V_{oc}$ (V) | $J_{sc}$ (mA/cm <sup>2</sup> ) | F.F. (%) | PCE (%) |
|-----------------------------|--------------|--------------------------------|----------|---------|
|-----------------------------|--------------|--------------------------------|----------|---------|

|       |         |             |              |              |             |
|-------|---------|-------------|--------------|--------------|-------------|
| 1.0 M | forward | 1.085±0.023 | 11.420±0.725 | 55.845±4.456 | 6.896±0.384 |
|       | reverse | 1.168±0.072 | 11.218±0.828 | 59.483±2.333 | 7.785±0.675 |
| 1.2 M | forward | 1.062±0.023 | 11.595±0.703 | 59.994±3.328 | 7.383±0.612 |
|       | reverse | 1.194±0.051 | 11.726±0.584 | 61.990±3.573 | 8.662±0.454 |
| 1.4 M | forward | 1.085±0.025 | 11.652±0.287 | 58.855±3.675 | 7.433±0.339 |
|       | reverse | 1.156±0.061 | 11.533±0.378 | 62.526±3.309 | 8.327±0.462 |

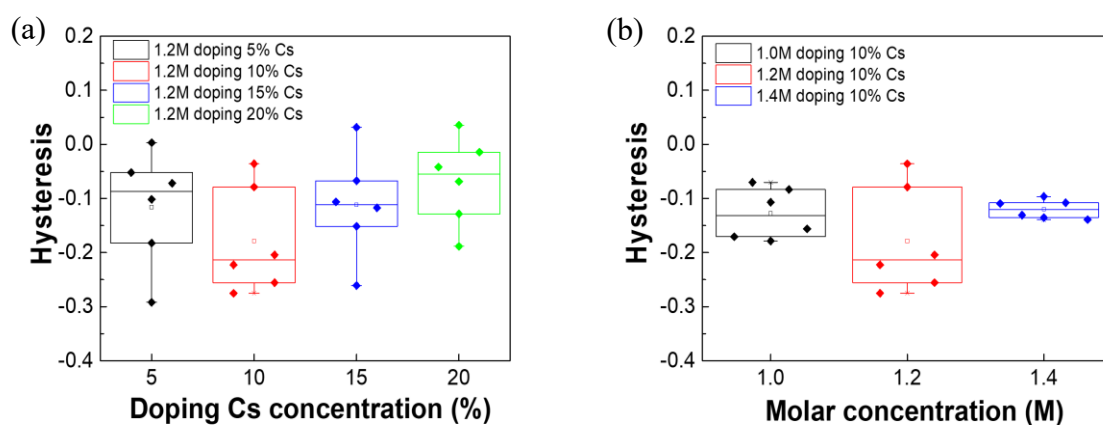

Figure S19. Hysteresis of PSCs (a) with various Cs doping concentrations, and (b) with 10% Cs doping but prepared with various constituent chemical molar concentrations.

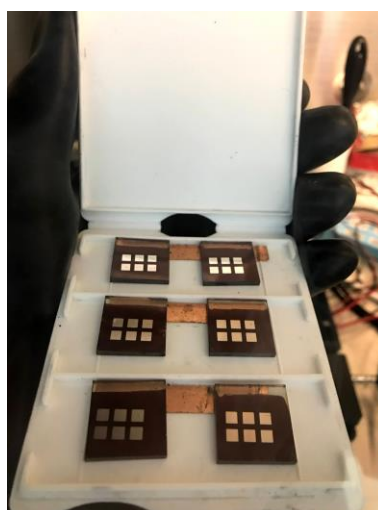

Figure S20. Actual sample image of fabricated perovskite solar cells.
